# Supplementary figures and images for: Resistance to pathogens in terpene down-regulated orange fruits inversely correlates with the accumulation of D-limonene in peel oil glands
Source: PubMed Central journal article supplement — Plant Signal Behav. 2015 May 29;10(6):e1028704. doi: 10.1080/15592324.2015.1028704 (PMC4622707; doi:10.1080/15592324.2015.1028704), 2015-05-29

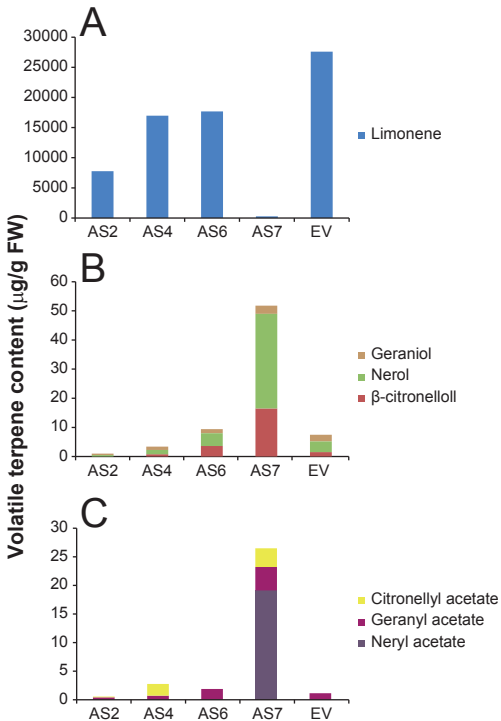

Supplement: kpsb-10-06-1028704-s001.pdf [file kpsb-10-06-1028704-s001.pdf]
